# Supplementary material for: Diversity and Distribution of Forest Ants (Hymenoptera: Formicidae) in Nepal: Implications for Sustainable Forest Management
Source: MDPI journal article supplement (doi:10.3390/insects12121128), 2021-12-17
Supplement: s1 [file s1]

**Supplementary Material S1.** Species list of the ants from the study sites

---

**Dolichoderinae (4 genera, 6 species)**

*Iridomyrmex anceps* (Roger, 1863)  
*Iridomyrmex* sp 1  
*Ochetellus glaber* (Mayr, 1862)  
*Tapinoma melanocephalum* (Fabricius, 1793)  
*Technomyrmex* sp 1  
*Technomyrmex* sp 2

**Ectatomminae (1 genus, 1 species)**

*Gnamptogenys bicolor* (Emery, 1889)

**Formicinae (11 genera, 24 species)**

*Camponotus (Tanaemyrmex)* sp 1  
*Camponotus (Tanaemyrmex)* sp 2  
*Camponotus (Tanaemyrmex)* sp 3  
*Camponotus mutilarius* Emery, 1893  
*Camponotus rufoglaucus* (Jerdon, 1851)  
*Camponotus sericeus* (Fabricius, 1798)  
*Colobopsis vitrea* (Smith, 1860)  
*Lasius magnus* Seifert, 1992  
*Lepisiota* sp 1  
*Lepisiota* sp 2  
*Oecophylla smaragdina* (Fabricius, 1775)  
*Pseudolasius* sp 1  
*Nylanderia* sp 1  
*Nylanderia* sp 2  
*Nylanderia* cf. *smythiesii*  
*Paratrechina longicornis* (Latreille, 1802)  
*Plagiolepis* sp 1  
*Plagiolepis* sp 2  
*Polyrhachis lacteipennis* Smith, 1858  
*Polyrhachis laevissima* Smith, 1858  
*Polyrhachis punctillata* Roger, 1863  
*Prenolepis fustinoda* Williams & LaPolla 2016  
*Prenolepis naoroji* Forel, 1902  
**Myrmicinae (13 genera, 30 species)**  
*Aphaenogaster beesonii* Donisthorpe, 1933  
*Cardiocondyla wroughtonii* (Forel, 1890)  
*Cardiocondyla* sp 2  
*Carebara affinis* (Jerdon, 1851)

**Myrmicinae**

*Crematogaster* sp 1  
*Crematogaster* sp 2  
*Crematogaster* sp 3  
*Crematogaster* sp 4  
*Crematogaster* sp 5  
*Crematogaster* sp 6  
*Lophomyrmex ambiguus* Rigato, 1994  
*Lophomyrmex* cf. *bedoti*  
*Meranoplus bicolor* (Guérin-Méneville, 1844)  
*Monomorium* cf. *sahlbergi*  
*Monomorium pharaonis* (Linnaeus, 1758)  
*Myrmica weberi* Elmes & Radchenko, 2009  
*Myrmica indica* Weber, 1950  
*Myrmecaria brunnea* gr sp 1  
*Pheidole* sp 1  
*Pheidole* sp 2  
*Pheidole* sp 3  
*Pheidole* sp 4  
*Pheidole* sp 5  
*Temnothorax* sp 1  
*Temnothorax* sp 2  
*Temnothorax* sp 3  
*Tetramorium lanuginosum* Mayr, 1870  
*Tetramorium* cf. *obesum*  
*Tetramorium* sp 1  
*Trichomyrmex destructor* (Jerdon, 1851)

**Ponerinae (6 genera, 7 species)**

*Brachyponera chinensis* (Emery, 1895)  
*Diacamma scalpratum* (Smith, 1858)  
*Diacamma* sp 1  
*Ectomomyrmex* sp 1  
*Leptogenys diminuta* (Smith, 1857)  
*Odontoponera denticulata* (Smith, 1858)  
*Pseudoneoponera bispinosa* (Smith, 1858)  
**Pseudomyrmicinae (1 genus, 2 species)**  
*Tetraponera rufonigra* (Jerdon, 1851)  
*Tetraponera allaborans* (Walker, 1859)

---

**Supplementary Material S2.** Recorded ant genera, their elevational distribution and sites of occurrence

| Ant genera           | Number<br>of species | Elevation |      | Total number<br>of<br>occurrences | Sites of occurrence                      | Districts                                     |
|----------------------|----------------------|-----------|------|-----------------------------------|------------------------------------------|-----------------------------------------------|
|                      |                      | Min.      | Max  |                                   |                                          |                                               |
| <i>Iridomyrmex</i>   | 2                    | 418       | 1455 | 4                                 | CMM, EMM                                 | TN, IL, PN                                    |
| <i>Ochetellus</i>    | 1                    | 1455      | 1455 | 1                                 | EMM                                      | PN                                            |
| <i>Tapinoma</i>      | 1                    | 183       | 937  | 8                                 | WS, CS, CMM                              | KL, NP, TN, LM                                |
| <i>Technomyrmex</i>  | 2                    | 93        | 1265 | 20                                | WT, CS, CMM, ET, ES, EMM                 | KL, NP, TN, LM, JP, IL, PN                    |
| <i>Gnamptogenys</i>  | 1                    | 144       | 183  | 2                                 | CS                                       | NP                                            |
| <i>Camponotus</i>    | 6                    | 87        | 1407 | 40                                | WT, WS, WMM, CT, CS, CMM, ET,<br>EMM     | KL, DA, DR, SA, RP, NP,<br>TN, LM, JP, PN     |
| <i>Colobopsis</i>    | 1                    | 338       | 338  | 1                                 | ES                                       | IL                                            |
| <i>Lasius</i>        | 1                    | 2199      | 2210 | 2                                 | EMM, WMM                                 | DD, PN                                        |
| <i>Lepisiota</i>     | 2                    | 144       | 2208 | 10                                | WMM, CS, CMM, EMM                        | DR, DD, NP, TN, PN                            |
| <i>Oecophylla</i>    | 1                    | 87        | 983  | 37                                | WT, WS, CT, CS, CMM, ET, ES              | KL, SU, RP, NP, TN, LM, JP,<br>IL             |
| <i>Pseudolasius</i>  | 1                    | 276       | 276  | 1                                 | ES                                       | IL                                            |
| <i>Nylanderia</i>    | 3                    | 87        | 2135 | 38                                | WT, WS, WMM, CT, CMM, ET, ES,<br>EMM     | KL, DR, DD, SA, RP, NP,<br>TN, LM, JP, IL, PN |
| <i>Paratrechina</i>  | 1                    | 175       | 418  | 3                                 | WT, CS, CMM                              | KL, NP, TN                                    |
| <i>Plagiolepis</i>   | 2                    | 119       | 859  | 3                                 | CS, CMM                                  | NP, TN                                        |
| <i>Polyrhachis</i>   | 3                    | 94        | 898  | 10                                | WT, CT, CS, CMM, ET, EMM                 | KL, SA, NP, TN, JP, PN                        |
| <i>Prenolepis</i>    | 3                    | 119       | 487  | 7                                 | CT, CS, CMM                              | SA, NP, TN                                    |
| <i>Aphaenogaster</i> | 1                    | 2218      | 2218 | 1                                 | WMM                                      | DD                                            |
| <i>Cardiocondyla</i> | 2                    | 128       | 1416 | 5                                 | WMM, CS, CMM                             | DR, NP, TN                                    |
| <i>Carebara</i>      | 1                    | 802       | 802  | 1                                 | WS                                       | SU                                            |
| <i>Crematogaster</i> | 6                    | 93        | 2208 | 42                                | WT, WS, CT, CS, CMM, ET, ES,<br>EMM      | KL, DR, RP, NP, TN, LM,<br>JP, IL, PN         |
| <i>Lophomyrmex</i>   | 2                    | 93        | 2218 | 31                                | WS, WMM, CS, CMM, ET, ES,<br>EMM         | KL, DR, DD, NP, TN, LM,<br>JP, IL, PN         |
| <i>Meranoplus</i>    | 1                    | 94        | 1000 | 10                                | WT, WS, CT, CS, CMM, ET                  | KL, SA, NP, TN, JP, PN                        |
| <i>Monomorium</i>    | 2                    | 115       | 952  | 7                                 | WT, WS, CT, CS, CMM, ES                  | KL, SA, NP, TN, IL                            |
| <i>Myrmica</i>       | 2                    | 2590      | 2693 | 5                                 | EHM                                      | TP                                            |
| <i>Myrmicaria</i>    | 1                    | 95        | 2664 | 10                                | WS, CT, CS, ET, EHM                      | KL, RP, NP, JP, TP                            |
| <i>Pheidole</i>      | 5                    | 95        | 2208 | 32                                | WT, WS, WMM, CT, CS, CMM, ET,<br>ES, EMM | KL, DR, RP, NP, TN, LM,<br>JP, IL, PN         |
| <i>Temnothorax</i>   | 3                    | 2210      | 3413 | 3                                 | WMM, EHM                                 | DD, TP                                        |
| <i>Tetramorium</i>   | 3                    | 128       | 1275 | 10                                | WT, CS, CMM, ES, EMM                     | KL, NP, LM, IL, TP                            |
| <i>Trichomyrmex</i>  | 1                    | 204       | 245  | 3                                 | WT, WS                                   | KL                                            |
| <i>Brachyponera</i>  | 1                    | 284       | 2210 | 7                                 | WS, WMM                                  | KL, SU, DD                                    |
| <i>Diacamma</i>      | 2                    | 98        | 144  | 4                                 | CT, CS, ET                               | SA, NP, JP                                    |
| <i>Ectomomyrmex</i>  | 1                    | 265       | 265  | 1                                 | WS                                       | KL                                            |

|                        |   |     |      |   |                  |                |
|------------------------|---|-----|------|---|------------------|----------------|
| <i>Leptogenys</i>      | 1 | 198 | 198  | 1 | CS               | NP             |
| <i>Odontoponera</i>    | 1 | 734 | 1416 | 3 | WMM              | DR             |
| <i>Pseudoneoponera</i> | 1 | 204 | 204  | 1 | WT               | KL             |
| <i>Tetraponera</i>     | 2 | 98  | 983  | 4 | WS, CMM, ET, EMM | KL, TN, JP, PN |

WT: Western Terai, WS: Western Siwalik, WMM: Western Mid Mountain, CT: Central Terai, CS: Central Siwalik, CMM: Central Mid Mountain, ET: Eastern Terai, ES: Eastern Siwalik, EMM: Eastern Mid Mountain, EHM: Eastern High Mountain

DA: Dang, DR: Darchula, DD: Dadeldhura, IL: Ilam, JP: Jhapa, KL: Kailali, LM: Lamjung, NP: Nawalpur, PN: Panchthar, RP: Rupandehi, SA: Sarlahi, SU: Surkhet, TP: Taplejung, TN: Tanahun

### Supplementary Material S3. Occurrence of ant genera in different forest types

| Forest types                                           | Number of genera | Ant genera                                                                                                                                                                                                                                                                                                                                                                                                                                                                                                                                                                                                              |
|--------------------------------------------------------|------------------|-------------------------------------------------------------------------------------------------------------------------------------------------------------------------------------------------------------------------------------------------------------------------------------------------------------------------------------------------------------------------------------------------------------------------------------------------------------------------------------------------------------------------------------------------------------------------------------------------------------------------|
| <i>Acacia</i> forest                                   | 4                | <i>Lophomyrmex</i> , <i>Nylanderia</i> , <i>Crematogaster</i> , <i>Prenolepis</i>                                                                                                                                                                                                                                                                                                                                                                                                                                                                                                                                       |
| <i>Alnus</i> forest                                    | 6                | <i>Camponotus</i> , <i>Tetramorium</i> , <i>Lophomyrmex</i> , <i>Pheidole</i> , <i>Nylanderia</i> , <i>Brachyponera</i>                                                                                                                                                                                                                                                                                                                                                                                                                                                                                                 |
| <i>Apis</i> forest                                     | 1                | <i>Temnothorax</i>                                                                                                                                                                                                                                                                                                                                                                                                                                                                                                                                                                                                      |
| <i>Bombax ceiba</i> forest                             | 2                | <i>Technomyrmex</i> , <i>Camponotus</i>                                                                                                                                                                                                                                                                                                                                                                                                                                                                                                                                                                                 |
| Champ plantation                                       | 10               | <i>Polyrhachis</i> , <i>Crematogaster</i> , <i>Monomorium</i> , <i>Oecophylla</i> , <i>Tapinoma</i> , <i>Nylanderia</i> , <i>Cardiocondyla</i> , <i>Camponotus</i> , <i>Plagiolepis</i> , <i>Lophomyrmex</i>                                                                                                                                                                                                                                                                                                                                                                                                            |
| <i>Cryptomeria</i> forest                              | 2                | <i>Crematogaster</i> , <i>Nylanderia</i>                                                                                                                                                                                                                                                                                                                                                                                                                                                                                                                                                                                |
| <i>Dalbergia sissoo</i> - <i>Acacia catechu</i> forest | 11               | <i>Camponotus</i> , <i>Meranoplus</i> , <i>Myrmecaria</i> , <i>Tetramorium</i> , <i>Cardiocondyla</i> , <i>Crematogaster</i> , <i>Monomorium</i> , <i>Technomyrmex</i> , <i>Prenolepis</i> , <i>Pheidole</i> , <i>Lophomyrmex</i>                                                                                                                                                                                                                                                                                                                                                                                       |
| Deodar forest (Plantation)                             | 1                | <i>Nylanderia</i>                                                                                                                                                                                                                                                                                                                                                                                                                                                                                                                                                                                                       |
| <i>Eucalyptus camaldulensis</i> plantation             | 6                | <i>Prenolepis</i> , <i>Meranoplus</i> , <i>Camponotus</i> , <i>Monomorium</i> , <i>Polyrhachis</i> , <i>Diacamma</i>                                                                                                                                                                                                                                                                                                                                                                                                                                                                                                    |
| Laurel forest                                          | 3                | <i>Myrmica</i> , <i>Temnothorax</i> , <i>Myrmecaria</i>                                                                                                                                                                                                                                                                                                                                                                                                                                                                                                                                                                 |
| Mixed broadleaf forest                                 | 12               | <i>Lophomyrmex</i> , <i>Nylanderia</i> , <i>Crematogaster</i> , <i>Pheidole</i> , <i>Oecophylla</i> , <i>Diacamma</i> , <i>Tetraponera</i> , <i>Myrmecaria</i> , <i>Technomyrmex</i> , <i>Camponotus</i> , <i>Brachyponera</i> , <i>Ectomomyrmex</i>                                                                                                                                                                                                                                                                                                                                                                    |
| Mixed broadleaf riverine forest                        | 6                | <i>Meranoplus</i> , <i>Camponotus</i> , <i>Pheidole</i> , <i>Plagiolepis</i> , <i>Prenolepis</i> , <i>Technomyrmex</i>                                                                                                                                                                                                                                                                                                                                                                                                                                                                                                  |
| Mixed forest                                           | 1                | <i>Myrmica</i>                                                                                                                                                                                                                                                                                                                                                                                                                                                                                                                                                                                                          |
| Pine forest                                            | 10               | <i>Odontoponera</i> , <i>Pheidole</i> , <i>Lepisiota</i> , <i>Cardiocondyla</i> , <i>Camponotus</i> , <i>Lophomyrmex</i> , <i>Lepisiota</i> , <i>Crematogaster</i> , <i>Iridomyrmex</i> , <i>Ochetellus</i>                                                                                                                                                                                                                                                                                                                                                                                                             |
| <i>Quercus</i> forest                                  | 6                | <i>Temnothorax</i> , <i>Lasius</i> , <i>Brachyponera</i> , <i>Lepisiota</i> , <i>Aphaenogaster</i> , <i>Lophomyrmex</i>                                                                                                                                                                                                                                                                                                                                                                                                                                                                                                 |
| Riverine forest                                        | 7                | <i>Trichomyrmex</i> , <i>Tapinoma</i> , <i>Oecophylla</i> , <i>Pheidole</i> , <i>Meranoplus</i> , <i>Camponotus</i> , <i>Polyrhachis</i>                                                                                                                                                                                                                                                                                                                                                                                                                                                                                |
| Sal ( <i>Shorea robusta</i> ) forest                   | 29               | <i>Pheidole</i> , <i>Trichomyrmex</i> , <i>Crematogaster</i> , <i>Nylanderia</i> , <i>Paratrechina</i> , <i>Oecophylla</i> , <i>Technomyrmex</i> , <i>Tetramorium</i> , <i>Monomorium</i> , <i>Polyrhachis</i> , <i>Pseudoneoponera</i> , <i>Meranoplus</i> , <i>Camponotus</i> , <i>Tetraponera</i> , <i>Lophomyrmex</i> , <i>Tapinoma</i> , <i>Carebara</i> , <i>Brachyponera</i> , <i>Odontoponera</i> , <i>Lepisiota</i> , <i>Myrmecaria</i> , <i>Plagiolepis</i> , <i>Gnamptogenys</i> , <i>Diacamma</i> , <i>Iridomyrmex</i> , <i>Cardiocondyla</i> , <i>Prenolepis</i> , <i>Pseudolasius</i> , <i>Colobopsis</i> |

|                                  |    |                                                                                                                                           |
|----------------------------------|----|-------------------------------------------------------------------------------------------------------------------------------------------|
| Sal forest (Managed)             | 11 | <i>Polyrhachis, Leptogenys, Myrmicaria, Camponotus, Nylanderia, Oecophylla, Prenolepis, Crematogaster, Tapinoma, Pheidole, Meranoplus</i> |
| <i>Schima-Castanopsis</i> forest | 9  | <i>Lophomyrmex, Technomyrmex, Meranoplus, Pheidole, Oecophylla, Crematogaster, Tapinoma, Tetramorium, Iridomyrmex</i>                     |
| Teak Plantation                  | 2  | <i>Camponotus, Nylanderia</i>                                                                                                             |
| Utis forest                      | 4  | <i>Crematogaster, Lepisiota, Lasius, Pheidole</i>                                                                                         |
